# Supplementary material for: First Identification and Molecular Characterization of Trichinella britovi in Pine Marten (Martes martes) in Romania
Source: Preprints.org preprint supplement (doi:10.20944/preprints202308.1949.v1), 2023-08-30
Supplement: Supplementary file 1 [file supplementary]

**Supplementary Materials:**


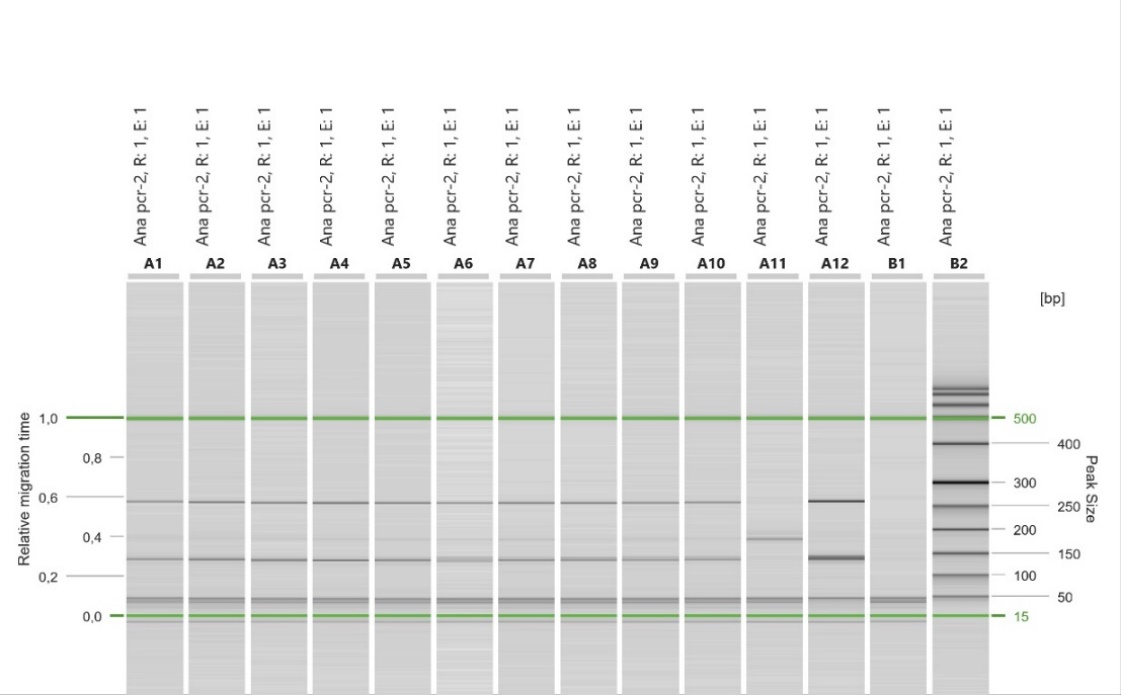


Figure S1. Capillary electrophoresis run of the multiplex PCR on *Trichinella* larvae collected from the pine marten. A1 to A10 larvae isolated from the pine marten; A11 *T. spiralis* positive control; A12 *T. britovi* positive control; B1 negative control; B2 size marker.
